# Supplementary material
Source: PubMed Central journal article supplement (PMC11132912)
Supplement: NIHMS1991839-supplement-Supplementary_Information_PMID36202931_pdf.pdf [file NIHMS1991839-supplement-Supplementary_Information_PMID36202931_pdf.pdf]

**Supplementary information**

---

**Targeting replication stress in cancer therapy**

---

In the format provided by the authors and unedited

**Supplementary Table 1.** Genomic alterations leading to replication stress in high-grade serous ovarian carcinoma

| Mechanism of replication stress induction | Molecular alteration                 | Frequency in HGSOC | Comments                                                                                                                                                                                                                                                |
|-------------------------------------------|--------------------------------------|--------------------|---------------------------------------------------------------------------------------------------------------------------------------------------------------------------------------------------------------------------------------------------------|
| Loss of the G1/S checkpoint               | <i>TP53</i> mutations                | ~ 100%             | . Mutual exclusivity between <i>CCNE1</i> , <i>RB1</i> , and <i>CDKN2A</i> alterations<br>. Mutual exclusivity between HRR alterations and <i>CCNE1</i> amplification - cyclin E1 overexpression which is associated with platinum and PARPi resistance |
| Premature entry into S phase              | <i>CCNE1</i> amplification           | 20%                |                                                                                                                                                                                                                                                         |
|                                           | <i>RB1</i> loss                      | 11%                |                                                                                                                                                                                                                                                         |
| DNA repair deficiencies                   | <i>CDKN2A</i> mRNA downregulation    | 32%                | . Association between HRR alterations and <i>RB1</i> loss which is related to platinum sensitivity and long-term survival                                                                                                                               |
|                                           | HRR alterations                      | ~ 50%              |                                                                                                                                                                                                                                                         |
| Oncogenic drive                           | NER alterations                      | ~ 5%               | . Mutual exclusivity between <i>KRAS</i> and <i>NF1</i> alterations                                                                                                                                                                                     |
|                                           | <i>MYC</i> amplification             | ~ 40%              |                                                                                                                                                                                                                                                         |
|                                           | <i>NF1</i> loss                      | ~ 10%              |                                                                                                                                                                                                                                                         |
|                                           | <i>KRAS</i> amplification / mutation | 11%                |                                                                                                                                                                                                                                                         |

HGSOC, high-grade serous ovarian carcinoma; mRNA, messenger RNA; HRR, homologous recombination repair; PARPi, PARP inhibitor

**Supplemental table 2** Summary of pharmacokinetics and pharmacodynamics characteristics of drug candidates from early phase studies

| Target      | Drug names                      | IC50 of the target kinase      | Half-life | Dosing schedule monotherapy                                                             | Dosing schedule in selected combinations                                                                                                                                                                                                                     | Administration |
|-------------|---------------------------------|--------------------------------|-----------|-----------------------------------------------------------------------------------------|--------------------------------------------------------------------------------------------------------------------------------------------------------------------------------------------------------------------------------------------------------------|----------------|
| <b>ATR</b>  | Berzosertib (M6620 / VE822)     | ATR < 0.2nM                    | 16h       | 240 mg/m <sup>2</sup> QD on day 1 q7                                                    | Carboplatin AUC5 and berzosertib 90 mg/m <sup>2</sup> on d 2, d9 q21<br>Topotecan 1.25mg/m <sup>2</sup> d1-5 and berzosertib 210 mg/m <sup>2</sup> on days 2 and 5 q21<br>Gemcitabine 1000mg/m <sup>2</sup> d1,8 and berzosertib 210mg/m <sup>2</sup> d2, d9 | i.v.           |
|             | Ceralasertib (AZD6738)          | ATR = 4nM                      | 12h       | 160mg BD days 1-14 q28                                                                  | Paclitaxel 80mg/m <sup>2</sup> d1, 8, 15 and ceralasertib 240mg BD days 1-14 q28<br>Olaparib 300mg BD and ceralasertib 160mg QD days 1-7 q28                                                                                                                 | p.o.           |
|             | BAY1895344                      | ATR = 7nM                      | 11.5h     | 3 days on / 4 days off or<br>3 days on / 11 days off                                    |                                                                                                                                                                                                                                                              | p.o.           |
| <b>CHK1</b> | Prexasertib                     | CHK1 = 0.9nM<br>CHK2 = 8nM     | 11.5h     | 105mg/m <sup>2</sup> QD on day 1 q14                                                    | Olaparib 100mg BD d1-5, d15-19 and prexasertib 70mg/m <sup>2</sup> day 1 q14<br>Samotolisib 150mg BD d1-14 and prexasertib 105mg/m <sup>2</sup> d1 q14d                                                                                                      | i.v.           |
|             | SRA737                          | CHK1 = 1.4nM<br>CHK2 = 1,850nM | 10.5h     | 800mg QD continuously                                                                   | Gemcitabine 250mg/m <sup>2</sup> d1, d8, d15 and SRA737 500mg QD on d 2-3, d8-9, d16-17 q28                                                                                                                                                                  | p.o.           |
|             | LY2880070                       | CHK1 = 1.2nM                   | 5.3h      | 200mg BD continuously                                                                   | Gemcitabine 100mg/m <sup>2</sup> d1, d8, d15 and LY2880070 50mg BD d1-5, d9-13, d16-20 q21                                                                                                                                                                   | p.o.           |
| <b>WEE1</b> | Adavosertib (AZD1775 / MK-1775) | WEE1 = 5.2nM                   | 11h       | 225mg BD for 2.5 days weeks 1 and 2 of q21 or<br>300mg QD days 1-5 and days 8-12 of q21 | Carboplatin AUC5 and adavosertib 225mg BD for 2.5 days q21<br>Cisplatin 75mg/m <sup>2</sup> d1 and adavosertib: 200mg BD for 2.5 days q21<br>Gemcitabine 1000mg/m <sup>2</sup> d1, d8, d15 and adavosertib 175mg QD for 2.0 days weekly q28                  | p.o.           |
| <b>MYT1</b> | RP-6306                         | MYT1 = 3.1nM                   | 1.58h     | Ongoing phase 1 dose escalation                                                         | -                                                                                                                                                                                                                                                            | p.o.           |

QD, once daily; BD, twice daily; AUC, area under the curve; i.v, intravenous; p.o., by mouth.

**Supplementary table 3.** Results of phase 1 clinical trials using ATR, CHK1, and WEE1 inhibitors

| Target | Study Identifier                                    | Agents / Schedule                                                                                                                                                                                                   | Design                      | Patients/Accrual                                                | Primary Endpoint | Results                                                                                                                                                                                                                                   | Comments                                                                     |
|--------|-----------------------------------------------------|---------------------------------------------------------------------------------------------------------------------------------------------------------------------------------------------------------------------|-----------------------------|-----------------------------------------------------------------|------------------|-------------------------------------------------------------------------------------------------------------------------------------------------------------------------------------------------------------------------------------------|------------------------------------------------------------------------------|
| ATR    | NCT02487095<br>Thomas et al.<br>J Clin Oncol 2018   | Berzosertib / Topotecan<br><br>MTD<br>Berzosertib 210mg/m <sup>2</sup> d2-5<br>Topotecan 1.25 mg/m <sup>2</sup> d1-5 q21d                                                                                           | Phase 1                     | Advanced solid tumors<br>N=21                                   | -                | Partial responses or prolonged stable disease in 3 of 5 patients with small-cell lung carcinoma                                                                                                                                           | . Neutropenia G≥3 19%<br>. Anemia G≥3 19%                                    |
|        | NCT02157792<br>Yap et al.<br>J Clin Oncol 2020      | Berzosertib / Carboplatin<br><br>MTD<br>Berzosertib 240mg/m <sup>2</sup> twice weekly<br><br>Berzosertib 90 mg/m <sup>2</sup> once weekly and Carboplatin AUC 5 d1 q21d                                             | Phase 1                     | Advanced solid tumors<br>N=40                                   | -                | Monotherapy 1 partial response in a patient with ATM loss and <i>ARID1A</i> mutation<br>Combination 1 partial response in a HGSOc germline <i>BRCA1</i> mutant patient platinum-resistant and PARPi-resistant                             |                                                                              |
|        | NCT02223923<br>Dilon et al.<br>ESMO 2019            | Ceralasertib<br><br>Ceralasertib 160mg BD d1-14 q28d                                                                                                                                                                | Phase 1                     | Advanced solid tumors<br>N=46                                   | -                | ORR 7%                                                                                                                                                                                                                                    | Intermittent schedule (d1-14 q28d) better tolerance than continuous schedule |
|        | NCT02264678<br>Krebs et al.<br>AAACR 2018           | Ceralasertib / Olaparib / Durvalumab<br><br>MTD<br>Ceralasertib 160mg QD d1-7<br>Olaparib 300mg BD d1-28<br><br>Ceralasertib 80-240 mg od or bd for 1 (d22-28) or 2 (d15-28) weeks<br>Durvalumab 1500 mg on D1 q28d | Phase 1                     | Advanced solid tumors<br>+Olaparib N=45<br>+Durvalumab N=45     | -                | +Olaparib:<br>Complete response 1 patient<br>Partial responses in 5 patients<br><br>+Durvalumab:<br>Complete response 1 patient<br>Partial responses in 2 patients                                                                        | DLT thrombocytopenia and neutropenia                                         |
|        | NCT02630199<br>Kim et al.<br>Clin Cancer Res 2021   | Ceralasertib / Paclitaxel<br><br>Ceralasertib 240mg BD d1-14<br>Paclitaxel 80mg/m <sup>2</sup> d1, d8, d15 q28d                                                                                                     | Phase 1                     | Advanced solid tumors<br>N= 57 patients                         | -                | ORR: 22.6%<br>ORR: 33.3% among 33 patients with immunotherapy-resistant melanoma                                                                                                                                                          | . Neutropenia 68%<br>. Anemia 44%<br>. Thrombocytopenia 37%                  |
|        | NCT03188965<br><br>Yap et al.<br>Cancer Discov 2020 | BAY 1895344<br><br>MTD 40 mg BID 3 days on/4 days off                                                                                                                                                               | Phase 1                     | Advanced solid tumor<br>N=21                                    | -                | <u>ORR 19.0% (4 of 21)</u><br>. All 4 responders presented <i>ATM</i> loss/mutation<br>. 1 long term responder HGSOc platinum-resistant <i>BRCAMut</i> PARPi-resistant<br>. PD-L1+ pretreatment showed upregulation of PD-L1 on treatment | . G≥3 Anemia 81.8%<br>. G≥3 Anemia 54.5%<br>. G≥3 Thrombocytopenia 45.5%     |
|        | NCT02264678<br>Yap et al.<br>Clin Cancer Res 2021   | Ceralasertib / Carboplatin<br><br>MTD<br>Ceralasertib 40mg BID d1,d2<br>Carboplatin AUC5 d1 q21d                                                                                                                    | Phase 1                     | Advanced solid tumors<br>N=36                                   | -                | <u>. 2 partial responses in patients with absent or low ATM or SLFN11 protein expression</u>                                                                                                                                              | . Anemia G≥3 39%<br>. Thrombocytopenia G≥3 36%<br>. Neutropenia G≥3 25%      |
|        | NCT<br>Hong et al.<br>J Clin Oncol 2016             | Prexasertib<br><br>MTD 105mg/m <sup>2</sup> d1 q14d                                                                                                                                                                 | Phase 1                     | Advanced solid tumors<br>N=45                                   | -                | 2 partial responses in patients with squamous cell carcinomas                                                                                                                                                                             | . Neutropenia G4 73%<br>. Febrile neutropenia 7%                             |
|        | NCT01115790<br>Hong et al.<br>Clin Cancer Res 2018  | Prexasertib<br><br>Prexasertib 105mg/m <sup>2</sup> d1 q14d                                                                                                                                                         | Phase 1<br>Expansion cohort | Squamous cell carcinomas anus, head and neck, and lung<br>N=101 | ORR              | <u>ORR 15%</u> for anal cancer and <u>5%</u> for head and neck                                                                                                                                                                            | . Neutropenia G4 71%<br>. Febrile neutropenia 12%                            |

|      |                                                       |                                                                                                                                                                                                                                                                                                                                    |         |                                                                                       |   |                                                                                       |                                                                                                                                                                                                                                                      |
|------|-------------------------------------------------------|------------------------------------------------------------------------------------------------------------------------------------------------------------------------------------------------------------------------------------------------------------------------------------------------------------------------------------|---------|---------------------------------------------------------------------------------------|---|---------------------------------------------------------------------------------------|------------------------------------------------------------------------------------------------------------------------------------------------------------------------------------------------------------------------------------------------------|
| CHK1 | NCT02124148<br>Hong et al.<br>Clin Cancer Res<br>2021 | Prexasertib / Samotolisib (PIK3CAi)<br><br>MTD<br>Prexasertib 105mg/m <sup>2</sup> d1 q14d<br>Samotolisib 150mg-BID                                                                                                                                                                                                                | Phase 1 | Solid tumors with<br><i>PIK3CA</i> mutations and<br>TNBC<br>N=53                      | - | ORR: 15.4%<br>13.3% tumors with <i>PIK3CA</i> mutation<br>and 25% TNBC                | . Thrombocytopenia 62.3%<br>. Neutropenia 94.3%<br>. Nausea 52.8%                                                                                                                                                                                    |
|      | NCT03057145<br>Do et al.<br>Clin Cancer Res<br>2021   | Prexssertib / Olaparib<br><br>MTD<br>Prexasertib 70mg/m <sup>2</sup> d1 and 15<br>Olaparib 100mg BD, d1-5, 15-19 q28d                                                                                                                                                                                                              | Phase 1 | Advanced solid tumor<br>Expansion cohort<br>HGSOC PARPi<br>resistant<br>N=29          | - | Partial responses in 4 of 18 patients<br>with PARPi resistant HGSOC                   | . Thrombocytopenia 66%<br>. Neutropenia 86%<br>. Anemia (72%)                                                                                                                                                                                        |
|      | NCT03495323<br>Do et al.<br>Cancer Imm imm<br>2021    | Prexasertib / LY3300054 (anti-PD-L1)<br><br>MTD<br>Prexasertib 70mg/m <sup>2</sup> d1 and 15<br>LY3300054 700mg d1 and 15 q28d                                                                                                                                                                                                     | Phase 1 | Advanced solid tumor<br>N=17                                                          | - | Partial response in 3 patients with<br><i>CCNE1</i> amplified tumors                  | Dose limiting toxicities: 1<br>grade 4 neutropenia for more<br>than 5 days, 1 febrile<br>neutropenia, 1 AST/ALT<br>elevation                                                                                                                         |
|      | NCT02797977<br>Banerji U et al.<br>ASCO 2019          | SRA737 / Gemcitabine<br><br>MTD<br>SRA737 500mg/d<br>Gem 250mg/m <sup>2</sup> d1 d8 q 21d                                                                                                                                                                                                                                          | Phase 1 | Advanced solid tumor<br>N=81 (evaluable)<br>28 HGSC cohort                            | - | ORR 11.7% (6 of 51)<br>FA pathway/ <i>BRC</i> Amut ORR 25% (4 of<br>16)               | . Nausea 50.7%<br>. Vomiting 50.4%<br>. Fatigue 43.2%<br>. Diarrhea 45.3%<br>. Anemia 33.1%                                                                                                                                                          |
|      | NCT02632448<br>Chu et al.<br>ASCO 2021                | LY2880070 / Gemcitabine<br><br>MTD<br>LY2880070 50mg BD d1-5 every week<br>Gemcitabine 100mg/m <sup>2</sup> d1,8,15 q21d                                                                                                                                                                                                           | Phase 1 | Advanced solid tumors<br>N=44                                                         | - | Partial response in 1 of 12 patients with<br>HGSOC                                    | Most common AEs: fatigue,<br>nausea and vomiting                                                                                                                                                                                                     |
| WEE1 | NCT01748825<br>Do et al.<br>J Clin Oncol 2015         | Adavosertib<br><br>MTD 225mg 2qd for 2.5days w1 and w2 q21d                                                                                                                                                                                                                                                                        | Phase 1 | Advanced solid tumor<br>N=25                                                          | - | 2 partial responses in patients with<br><i>BRCA1/2</i> mutated tumors                 | -                                                                                                                                                                                                                                                    |
|      | NCT00648648<br>Leijen et al.<br>J Clin Oncol 2016     | Adavosertib / Gemcitabine or Cisplatin or Carboplatin<br><br>MTD<br>Gemcitabine 1,000 mg/m <sup>2</sup> d1,d8,d15, adavosertib<br>175mg QD for 2.0days weekly for 3weeks q28d<br><br>Cisplatin 75 mg/m <sup>2</sup> , adavosertib 200mg BD for 2.5days<br>q21d<br><br>Carboplatin AUC 5, adavosertib 225mg 2qd for 2.5days<br>q21d | Phase 1 | Advanced solid tumors<br>N=202                                                        | - | ORR: 17 (10%) of 176 evaluable<br>patients                                            | Combo gem vs cis vs carbo:<br><br>Anemia ≥G3: 18 vs 4 vs 20%<br>. Neutropenia ≥G3: 36 vs 13<br>vs 24%<br>. Thrombocytopenia G≥3: 31<br>vs 11 vs 41%<br>. Diarrhea ≥G3: 2 vs 2 vs<br>15%<br>. Vomiting: 22 vs 53 vs 44%<br>. Fatigue: 58 vs 62 vs 59% |
|      | NCT02508246<br>Mendez Clin Cancer<br>Res 2018         | Adavosertib / Cisplatin / Docetaxel<br><br>MTD<br>Adavosertib 150mg 2qd for 2.5days d1-3 Cisplatin 25<br>mg/m <sup>2</sup> , docetaxel 35 mg/m <sup>2</sup> d1-8-15 q28d                                                                                                                                                           | Phase 1 | Stage 3 and 4,<br>treatment naive head<br>and neck squamous cell<br>carcinoma<br>N=12 | - | Partial responses in 5 of 10 evaluable<br>patients                                    | -                                                                                                                                                                                                                                                    |
|      | NCT02037230<br>Cuneo et al.<br>J Clin Oncol 2019      | Adavosertib / Gemcitabine / Radiotherapy<br><br>MTD<br>Gemcitabine 1,000 mg/m <sup>2</sup> d1,8 Adavosertib 150mg<br>d1,2,8,9 q21d                                                                                                                                                                                                 | Phase 1 | Locally advanced<br>unresectable pancreatic<br>cancer<br>N=34                         | - | PFS 9.4mo OS 21.7mo                                                                   | 8 (24%) patients with DLT in<br>level 1 dose                                                                                                                                                                                                         |
|      | NCT01748825<br>Takebe et al.                          | Adavosertib<br><br>MTD                                                                                                                                                                                                                                                                                                             | Phase 1 | Advanced solid tumors<br>N=42                                                         | - | ORR: 6 (14%)<br>4 of 10 HGSOC and 2 of 3 endometrial<br>2 <i>CCNE1</i> overexpression | 1 patient rapid progression<br>with <i>WEE1</i> mutation and<br><i>PKMYT1</i> overexpression                                                                                                                                                         |

|  |                                            |                                      |         |                               |   |                                                 |  |
|--|--------------------------------------------|--------------------------------------|---------|-------------------------------|---|-------------------------------------------------|--|
|  | Clin Cancer Res<br>2021                    | Adavosertib 300mg QD d1-5, 8-12 q21d |         |                               |   |                                                 |  |
|  | NCT04158336<br>Tolcher et al.<br>AACR 2021 | ZN-c3<br>MTD 300mg QD continuously   | Phase 1 | Advanced solid tumors<br>N=39 | - | 2 partial responses of 16 evaluable<br>patients |  |

MTD, maximum tolerated dose; HGSOC, high-grade serous ovarian carcinoma; QD, once daily; BD, twice daily; AUC, area under the curve; ORR, overall response rate; PFS, progression-free survival; PARPi, PARP inhibitor

**Supplementary table 4.** Results of phase 2 clinical trials using ATR, CHK1, and WEE1 inhibitors

| Target | Study Identifier                                              | Agents / Schedule                                                                                                                                                                                                                                                          | Design                         | Patients/Accrual                                                                                           | Primary Endpoint | Results                                                                                                         | Comments                                                                                                                                                                                                   |
|--------|---------------------------------------------------------------|----------------------------------------------------------------------------------------------------------------------------------------------------------------------------------------------------------------------------------------------------------------------------|--------------------------------|------------------------------------------------------------------------------------------------------------|------------------|-----------------------------------------------------------------------------------------------------------------|------------------------------------------------------------------------------------------------------------------------------------------------------------------------------------------------------------|
| ATR    | NCT 02595892<br>Konstantinopoulos et al.<br>Lancet Oncol 2020 | Gemcitabine / Berzosertib<br>Vs<br>Gemcitabine<br><br>Gem 1000 mg/m <sup>2</sup> d1 d8 q21d,<br>berzosertib 210 mg/m <sup>2</sup> d2 d9<br>q21d                                                                                                                            | Randomized<br>phase 2          | Platinum resistant HGSOC,<br>unlimited prior lines, up to 1 prior<br>regimen in platinum-resistant<br>N=70 | PFS              | <u>Median PFS</u><br>Gem/Berzo: 22.9 wks<br>Gem:14.7 wks<br>HR=0.57                                             | . Gem/Berzosertib:<br>. Thrombocytopenia G <sub>≥</sub> 3: 24%<br>. Neutropenia G <sub>≥</sub> 3: 47%<br>. In Gem alone:<br>. Thrombocytopenia G <sub>≥</sub> 3: 6%<br>. Neutropenia G <sub>≥</sub> 3: 39% |
|        | NCT02567409<br>Pal et al.<br>ASCO 2021                        | Berzosertib / Cisplatin /<br>Gemcitabine<br><br>Cisplatin 70mg/m <sup>2</sup> d1<br>Gemcitabine 1g/m <sup>2</sup> d1, d8 q21d<br><br>Cisplatin 60mg/m <sup>2</sup> d1<br>Gemcitabine 875mg/m <sup>2</sup> d1, d8<br>plus berzosertib at 90mg/m <sup>2</sup> d2,<br>d9 q21d | Randomized<br>Phase 2          | First line metastatic urothelial<br>carcinoma<br>N= 87                                                     | PFS              | <u>PFS: 8.0mo vs 8.0 mo</u><br>ORR: 63% vs 54%                                                                  | . Thrombocytopenia G <sub>≥</sub> 3 39%<br>vs 59%<br>. Neutropenia G <sub>≥</sub> 3 27% vs 37%                                                                                                             |
|        | NCT03780608<br>Kuon et al.<br>ASCO 2021                       | Ceralasertib / Durvalumab<br><br>Ceralasertib 240mg BD d1-14<br>Paclitaxel 80mg/m <sup>2</sup> d1, d8, d15<br>Durvalumab 1500mg d1 q28d                                                                                                                                    | Phase 2                        | Metastatic melanoma after<br>progression on anti-PD-1 or anti-<br>PD-L1<br>N=30                            | ORR              | <u>ORR: 30%</u><br>PFS: 7.1 mo                                                                                  | . Anemia G <sub>3</sub> 33.3%<br>. Neutropenia G <sub>≥</sub> 3 16.7%<br>. Thrombocytopenia G <sub>≥</sub> 3 23.4%                                                                                         |
|        | NCT03462342<br>Wethington et al.<br>ASCO 2021                 | Ceralesertib / Olaparib<br><br>Ceralesertib 160mg QD d1-7<br>Olaparib 300mg BD<br>continuously q28d                                                                                                                                                                        | Phase 2<br>Single arm          | Platinum-sensitive ovarian cancer<br>progressing on PARPi<br>N=13                                          | ORR              | <u>ORR 46% (6 of 13 patients)</u>                                                                               | . Anemia G <sub>≥</sub> 3: 1 patient (7.7%)<br>. Neutropenia G <sub>≥</sub> 3: 1 patient<br>(7.7%)<br>. Thrombocytopenia G <sub>≥</sub> 3: 3<br>patients (23.1%)                                           |
| CHK1   | NCT 02203513<br>Lee JM et al.<br>Lancet Oncol 2019            | Prexasertib<br><br>Prexasertib 105mg/ m <sup>2</sup> d1 q14d                                                                                                                                                                                                               | Phase 2,<br>Single Arm         | HGSOC or HG endometrioid<br>ovarian cancer, germline <i>BRCA</i> wt<br>N=24 (evaluable)                    | ORR              | <u>ORR: 33%</u><br>8 patients, all PRs<br>4 of 8 PRs in tumors with <i>CCNE1</i><br>overexpression              | . Thrombocytopenia G <sub>≥</sub> 3: 25%<br>. Neutropenia G <sub>≥</sub> 3: 93%<br>. Febrile neutropenia G <sub>3</sub> : 7%                                                                               |
|        | NCT02203513<br>Lampert EJ et al.<br>ASCO 2020                 | Prexasertib<br><br>Prexasertib 105mg/m <sup>2</sup> d1 q14d                                                                                                                                                                                                                | Phase 2<br>Single arm          | HGSOC, <i>BRCA</i> mut<br>N=18                                                                             | -                | <u>ORR: 11%</u><br>2 patients, both plat S, one with prior PARP<br>inhibitor treatment                          | . Thrombocytopenia G <sub>≥</sub> 3: 14%<br>. Neutropenia G <sub>≥</sub> 3: 82%<br>. Febrile neutropenia G <sub>3</sub> : 5%                                                                               |
|        | NCT02797964<br>Plummer et al.<br>ASCO 2020                    | SRA737<br><br>Expansion cohort 800mg/d                                                                                                                                                                                                                                     | Phase 1/2                      | Expansion cohort HGSOE<br>enriched for <i>CCNE1</i> amp<br>N=38                                            | DCR              | <u>DCR 54%</u><br>. No PR/CR. 2 pts maximal tumor reduction<br>29% and 27%<br>. No association <i>CCNE1</i> amp | . Diarrhea 68.2% (G <sub>≥</sub> 3: 19%)<br>. Nausea 66.4% (G <sub>≥</sub> 3: 2.8%)<br>. Vomiting 51.4% (G <sub>≥</sub> 3: 2.8%)<br>. Fatigue 46.7% (G <sub>≥</sub> 3: 2.8%)                               |
|        | NCT02735980<br>Byers LA et al.<br>Clin Lung Cancer<br>2021    | Prexasertib<br><br>Prexasertib 105mg/m <sup>2</sup> d1 q14d                                                                                                                                                                                                                | Phase 2<br>Parallel-<br>cohort | Cohort 1: Platinum-sensitive<br>Cohort 1: Platinum-resistant<br>Small cell lung cancer                     | ORR              | ORR 5.2% and 0%<br>PFS 1.41 mo and 1.36mo                                                                       | . Thrombocytopenia 51.8% and<br>50.0%<br>. Neutropenia: 69.5% and<br>73.3%<br>. Febrile neutropenia: 19.6%<br>and 1%                                                                                       |

|      |                                                      |                                                                                                                                                                                                                               |                           |                                                                                                                               |                                  |                                                                                                                                          |                                                                                                                                                                                           |
|------|------------------------------------------------------|-------------------------------------------------------------------------------------------------------------------------------------------------------------------------------------------------------------------------------|---------------------------|-------------------------------------------------------------------------------------------------------------------------------|----------------------------------|------------------------------------------------------------------------------------------------------------------------------------------|-------------------------------------------------------------------------------------------------------------------------------------------------------------------------------------------|
| WEE1 | NCT 01164995<br>Leijen et al.<br>J Clin Oncol 2016   | Carboplatin / Adavosertib<br><br>Carboplatin AUC 5 d1, adavosertib 225mg 2qd for 2.5days q21d                                                                                                                                 | Phase 2,<br>Single Arm    | <i>TP53</i> -mutated ovarian cancer, refractory or resistant (<3 months) to 1 <sup>st</sup> line platinum<br>N=21 (evaluable) | ORR                              | <u>ORR: 43%</u><br>9 patients (1 CR + 8 PR)<br>PFS 5.3mo OS 12.6mo                                                                       | . Thrombocytopenia G≥3: 48%<br>. Neutropenia G≥3: 37%                                                                                                                                     |
|      | NCT 02151292<br>Lhereux et al.<br>Lancet Oncol 2021  | Gemcitabine / Adavosertib<br>Vs<br>Gemcitabine/Placebo<br><br>Gemcitabine 1000mg/m <sup>2</sup> D1 D8 D15 ± adavosertib 175mg daily D1–2, D8–9, D15–16 q28d                                                                   | Randomized,<br>Phase 2    | Platinum Resistant/Refractory HGSOC, unlimited prior lines<br>N=124                                                           | PFS                              | <u>Median PFS</u><br>Gem/Adavo: 4.6 months<br>Gem/Placebo: 3.0 months<br>HR=0.56, ORR 21% vs 3%                                          | Gem/Adavosertib:<br>. Thrombocytopenia G≥3: 31%<br>. Neutropenia G≥3: 62%                                                                                                                 |
|      | NCT02272790<br>Moore K et al.<br>ASCO 2019           | Adavosertib 175–225 mg BD, several schedules + gemcitabine 800mg/m <sup>2</sup> d1, d8 ,d15 or paclitaxel 80mg/m <sup>2</sup> d1, d8, d15 or carboplatin AUC 5, d1 or pegylated liposomal doxorubicin 40 mg/m <sup>2</sup> d1 | Non-randomized<br>Phase 2 | Platinum Resistant HGSC, ≤4 prior lines<br>N=94                                                                               | ORR                              | <u>ORR 31.9%</u><br>ORR Carboplatin/Adavosertib 66.7% (8/12)<br>ORR <i>CCNE1</i> amp 46.1% (6/13)                                        | . Anemia ≥G3: 33.0%<br>. Neutropenia ≥G3: 45.7%<br>. Thrombocytopenia G≥3: 31.9%<br>. Diarrhea ≥G3: 10.6%<br>. Vomiting ≥G3: 10.6%                                                        |
|      | NCT 01164995<br>Oza et al.<br>Clin Cancer Res 2020   | Carbo / Taxol / Adavosertib<br>Vs<br>Carbo / Taxol / Placebo<br><br>Paclitaxel 175mg/m <sup>2</sup> D1 + carboplatin AUC 5, D1 + adavosertib 225mg BD for 2.5 days q21d                                                       | Randomized<br>Phase 2     | Platinum Sensitive <i>TP53</i> -mutated ovarian cancer<br>N=121                                                               | ePFS (by volumetric RECIST 1.1.) | <u>Median ePFS</u><br>Carboplatin/Taxol/Adavo: 7.9 months<br>Carboplatin/Taxol/Placebo: 7.3 months<br>HR=0.63                            | Carbo/Taxol/Adavosertib<br>. G≥3 AEs: 78%<br>. Anemia 53%<br>. Diarrhea 75%<br>. Vomiting 63%<br>Carbo/Taxol/Placebo<br>. G≥3 AEs:35%<br>. Anemia 32%<br>. Diarrhea 37%<br>. Vomiting 27% |
|      | NCT03668340<br>Liu et al.<br>J Clin Oncol 2021       | Adavosertib<br><br>Adavosertib 300mg QD d1-5, 8-12 q21d                                                                                                                                                                       | Phase 2<br>Single arm     | HGSEC second line<br>N=34                                                                                                     | ORR<br>PFS6mo                    | <u>ORR: 29.4%</u><br><u>PFS6mo: 47.1%</u><br>PFS: 6.1mo                                                                                  | . Diarrhea 85.3%, G3 5.9%<br>. Nausea 61.8%, G3 8.8%<br>. Fatigue 64.7%, G3 23.5%<br>. Anemia 67.6%, G3 23.5%<br>. Thrombocytopenia 61.8%, G3 14.7%<br>. Neutropenia 44.1%, G3-4 32.3%    |
|      | NCT03012477<br>Keenan et al.<br>Clin Cancer Res 2020 | Adavosertib / Cisplatin<br><br>Cisplatin 75mg/m <sup>2</sup> d1<br>Adavosertib 200mg BD for 2.5d d1-3 q21d                                                                                                                    | Phase 2<br>Single arm     | Metastatic TNBC first or second line<br>N=34                                                                                  | ORR                              | <u>ORR: 26%</u><br>PFS: 4.9mo                                                                                                            | . Diarrhea 35%, G3 21%<br>. Nausea 50%, G3 6%<br>. Anemia 29%, G3 12%<br>. Neutropenia 29%, G3 18%                                                                                        |
|      | NCT03253679<br>Fu et al.<br>AACR 2021                | Adavosertib<br><br>Adavosertib 300mg QD d1-5, 8-12 q21d                                                                                                                                                                       | Phase 2<br>Single arm     | <i>CCNE1</i> amplified (CN >7) tumors<br>N=29                                                                                 | ORR                              | <u>ORR: 26%</u><br>Partial response in 5 of 13 (38%) ovarian cancer patients<br>Partial response in 1 melanoma and 1 urothelial patients | . Neutropenia G3-4 24%<br>. Thrombocytopenia G3-4 17%<br>. Fatigue G3-4 17%<br>. Diarrhea G3-4 17%                                                                                        |
|      | NCT03579316<br>Coleman et al.<br>ASCO 2021           | Adavosertib / Olaparib<br><br>Adavosertib 300mg QD d1-5, 8-12 q21d                                                                                                                                                            | Randomized<br>Phase 2     | Platinum-sensitive ovarian cancer progressing on PARPi<br>N=80                                                                | ORR                              | <u>ORR: 23% and 29%</u><br>PFS: 5.5mo and 6.8mo<br><br><u><i>BRCA1/2</i> wild type ORR 31% and 39%</u>                                   | Adavosertib + olaparib<br>. Neutropenia G3-4 10%<br>. Thrombocytopenia G3-4 10%<br>. Fatigue G3-4 12%<br>. Diarrhea G3-4 12%                                                              |



|  |  |                                                          |  |  |  |  |  |
|--|--|----------------------------------------------------------|--|--|--|--|--|
|  |  | Adavosertib 150mg QD d1-3, 8-10 + Olaparib 200mg BD q21d |  |  |  |  |  |
|--|--|----------------------------------------------------------|--|--|--|--|--|

HGSOC, high-grade serous ovarian carcinoma; QD, once daily; BD, twice daily; AUC, area under the curve; ORR, overall response rate; DCR, disease control rate; PR, partial response; PFS, progression-free survival; PARPi, PARP inhibitor

**Supplementary Table 5.** Candidate synthetic lethal associations with ATR, CHK1, and WEE1 inhibitors based on clinical and preclinical data

| <b>Molecular alteration</b>       | <b>Causative mechanisms and frequency</b>                                                                           | <b>Synthetic lethal partner</b> | <b>Mechanism of synthetic lethality</b>                                                      |
|-----------------------------------|---------------------------------------------------------------------------------------------------------------------|---------------------------------|----------------------------------------------------------------------------------------------|
| ATM loss                          | <i>ATM</i> missense mutations<br>3% of HGSOC                                                                        | ATR inhibition                  | Cells with ATM loss rely on ATR response to orchestrate DNA repair and cell cycle checkpoint |
| H3K36me3 loss                     | Loss of SETD2, overexpression of KDM4A, or mutation of histone H3.3<br><br><i>KDM4A</i> amplification in 6% of HGSC | WEE1 inhibition                 | Downregulation of <i>RRM2</i> expression leading to decrease in nucleotide pool              |
| SWI/SNF complex dysfunction       | <i>ARID1A</i> mutation in 50% of CCC and 30% EOC<br><br><i>SMARCA4</i> mutation in nearly all SCHOT                 | ATR inhibition                  | DNA decatenation leading to increased dependency on the G2/M checkpoint                      |
| Alternative telomere lengthening* | Multistep process, <i>ATRX</i> mutation is part of it but is insufficient alone.                                    | ATR inhibition                  | Dependency on RPA-ATR activation of HRR to elongate the telomere                             |

HGSOC, high-grade serous ovarian carcinoma; CCC, clear-cell carcinoma; EOC, endometrioid ovarian carcinoma; SCHOT, small-cell hypercalcemic ovarian tumor; HRR, homologous recombination repair

\* Contradictory results from different studies (refs. 201 and 202)

**Supplementary table 6.** Candidate biomarkers of response to ATR, CHK1, and WEE1 inhibitors

| <b>Group</b>                               | <b>Molecular alteration</b>                                                                |
|--------------------------------------------|--------------------------------------------------------------------------------------------|
| <b>Genomic alterations that lead to RS</b> | <i>TP53</i> mutations                                                                      |
|                                            | <i>CCNE1</i> amplification                                                                 |
|                                            | <i>RB1</i> loss                                                                            |
|                                            | <i>CDKN2A</i> mRNA downregulation                                                          |
|                                            | HRR alterations                                                                            |
|                                            | NER alterations                                                                            |
|                                            | <i>MYC</i> amplification                                                                   |
|                                            | <i>NF1</i> loss                                                                            |
| <b>Markers of cellular response to RS</b>  | pATR                                                                                       |
|                                            | pCHK1                                                                                      |
|                                            | pRPA                                                                                       |
|                                            | pH2AX                                                                                      |
|                                            | pKAP1                                                                                      |
| <b>Synthetic lethal associations</b>       | ATM loss                                                                                   |
|                                            | H3K36me3 loss (due to loss of SETD2, overexpression of KDM4A, or mutation of histone H3.3) |
|                                            | SWI/SNF complex dysfunction (due to <i>ARID1A</i> mutation, <i>SMARCA4</i> mutations)      |
| <b>Markers of treatment resistance</b>     | FAM122A low                                                                                |
|                                            | MYT1 upregulation                                                                          |
|                                            | p21 upregulation                                                                           |
|                                            | YAP expression                                                                             |
| <b>Pharmacodynamic biomarkers</b>          | ATR inhibitor: ↑ pH2AX, ↑ fork instability, ↓ pCHK1, ↑ pKAP1                               |
|                                            | CHK1 inhibitor: ↑ pH2AX, ↑ fork instability, ↑ pCHK1, ↑ pKAP1, ↑ RPA                       |
|                                            | WEE1 inhibitor: ↑ pH2AX, ↑ fork instability, ↑ pCHK1, ↑ RPA, ↓ pCDK1                       |

RS, replication stress; HRR, homologous recombination repair pathway; NER, nucleotide excision repair pathway

**Supplementary table 7.** Selected ongoing clinical trials with ATR, CHK1, and WEE1 inhibitors

| Strategy                            | Design             | Target      | Agents / Schedules                                                                                                                                                                     | Patients                                                                                                           | Biomarkers as inclusion criteria                                                                                                                                                                                                                                 | Status                 | Study Identifier             |
|-------------------------------------|--------------------|-------------|----------------------------------------------------------------------------------------------------------------------------------------------------------------------------------------|--------------------------------------------------------------------------------------------------------------------|------------------------------------------------------------------------------------------------------------------------------------------------------------------------------------------------------------------------------------------------------------------|------------------------|------------------------------|
| Biomarker driven monotherapy trials | Phase 2            | CHK1        | Prexasertib 105mg/m d1, d15 every 28 days                                                                                                                                              | Advanced solid tumors exhibiting replication stress or homologous recombination deficiency                         | . <i>MYC</i> amplification, <i>CCNE1</i> amplification, <i>RB1</i> loss, <i>FBXW7</i> mutation<br>. Somatic mutation in <i>BRCA1</i> , <i>BRCA2</i> , <i>PALB2</i> , <i>RAD51C</i> , <i>RAD51D</i> , <i>ATR</i> , <i>ATM</i> , <i>CHK2</i> , or FA pathway genes | Active, not recruiting | NCT02873975                  |
|                                     | Phase 2            | WEE1        | Adavosertib once daily, d1 to 5 and d8 to 12, 21-days cycle                                                                                                                            | Advanced refractory solid tumors                                                                                   | . <i>CCNE1</i> amplification                                                                                                                                                                                                                                     | Suspended              | NCT03253679                  |
| Combination with chemotherapy       | Phase 1            | ATR         | Gemcitabine 480–800 mg/m <sup>2</sup> d1 and d8, carboplatin AUC 4 d1, berzosertib 90–120 mg/m <sup>2</sup> d2 and d9, every 21 days                                                   | Platinum-sensitive ovarian cancer                                                                                  | . No                                                                                                                                                                                                                                                             | Recruiting             | NCT02627443                  |
|                                     | Phase 1            | ATR         | Gemcitabine d1 and 8, BAY 1895344 twice per day d1 to d3 and d8 to d10                                                                                                                 | . Incurable solid tumors<br>. Expansion cohort platinum resistant ovarian cancer                                   | . No                                                                                                                                                                                                                                                             | Not yet recruiting     | NCT04616534                  |
|                                     | Phase 1            | WEE1        | Gemcitabine and nab-paclitaxel d1,8 and 15; adavosertib QD d1,2,8,9,15, and 16                                                                                                         | Unresectable pancreatic adenocarcinoma                                                                             | . No                                                                                                                                                                                                                                                             | Active, not recruiting | NCT02194829                  |
| PARPi synergism                     | Phase 2            | ATR         | Ceralasertib 160mg d1 to d7, olaparib 300mg twice per day d1 to d28 every 28d                                                                                                          | . Recurrent HGSC irrespective of platinum sensitivity                                                              | . No                                                                                                                                                                                                                                                             | Recruiting             | NCT03462342 (CAPRI trial)    |
|                                     | Phase 2            | ATR         | . Ceralasertib 160mg d1 to d7, olaparib 300mg twice per day d1 to d28 every 28d<br>. Ceralasertib 160mg d1 to d7 every 28d as single agent                                             | . Recurrent gynecological cancers, including CCC and rare subtypes with frequent <i>ARID1A</i> loss                | . No<br>. <i>ARID1A</i> enriched                                                                                                                                                                                                                                 | Recruiting             | NCT04065269 (ATARI trial)    |
|                                     | Phase 2            | ATR<br>WEE1 | . Olaparib alone<br>. Olaparib and capivasertib<br>. Olaparib and ceralasertib<br>. Olaparib and adavosertib                                                                           | . Advanced solid tumors with positive predictive biomarkers                                                        | . Mutations in HR genes or <i>ATM</i> , <i>CHK2</i> , <i>MRN</i> ( <i>MRE11</i> / <i>NBS1</i> / <i>RAD50</i> ), <i>APOBEC</i> – Olaparib and ceralasertib<br>. Mutations in <i>TP53</i> or <i>KRAS</i> – Olaparib and adavosertib                                | Not yet recruiting     | NCT02576444 (OLPACO trial)   |
|                                     | Randomized phase 2 | ATR         | . Ceralasertib 160mg d1 to d7, olaparib 300mg twice per day d1 to d28 every 28d<br>. Placebo, olaparib                                                                                 | . HGSC relapsed after at least 6 months maintenance PARP inhibitor                                                 | . No                                                                                                                                                                                                                                                             | Recruiting             | NCT04239014 (DUETTE trial)   |
|                                     | Randomized phase 2 | ATR<br>WEE1 | . Olaparib 300 mg BD continuously<br>. Ceralasertib 160 mg QD d1-7 + Olaparib 300 mg BD continuously q28d<br>. Adavosertib 150 mg BD d1-3, d8-10+ Olaparib 300 mg BD continuously q21d | . Metastatic triple negative breast cancer                                                                         | . No                                                                                                                                                                                                                                                             | Active, not recruiting | NCT03330847 (VIOLETTE trial) |
|                                     | Phase 1            | ATR         | . BAY1895344 twice per day and niraparib once per day                                                                                                                                  | . Advanced solid tumors and ovarian cancer<br>. Two expansion ovarian cancer cohorts: PARPi naïve, PARPI resistant | . DDR deficiency                                                                                                                                                                                                                                                 | Recruiting             | NCT04267939                  |
|                                     | Phase 1            | WEE1        | . Olaparib twice per day on d1 to d5, d15 to d19, adavosertib once per day on d8 to 12 and d22 to d26                                                                                  | . Advanced refractory solid tumor with DDR mutations                                                               | . Mutations in <i>BRCA1/2</i> , <i>BRIP</i> , <i>FANCA</i> , <i>PALB2</i> , <i>ATM</i><br>. <i>CCNE1</i> amplification                                                                                                                                           | Recruiting             | NCT04197713 (STAR trial)     |
|                                     | Phase 1-2          | ATR         | . Ceralasertib<br>. Ceralasertib + carboplatin<br>. Ceralasertib + Olaparib<br>. Ceralasertib + durvalumab                                                                             | . Head and neck squamous cell carcinoma, non-small cell lung carcinoma, gastric, breast and ovarian cancer         | . No                                                                                                                                                                                                                                                             | Recruiting             | NCT02264678                  |
| Overcoming PARP resistance          | Phase 1-2          | ATR         | . Olaparib and ceralasertib                                                                                                                                                            | . Platinum-sensitive ovarian cancer post PARPi progression                                                         | . Mutations in <i>BRCA1/2</i>                                                                                                                                                                                                                                    | Recruiting             | NCT02264678                  |

|                            |           |      |                                                                                                                                                      |                                                                   |                                                                                                                                                                                                                                                                                 |                        |             |
|----------------------------|-----------|------|------------------------------------------------------------------------------------------------------------------------------------------------------|-------------------------------------------------------------------|---------------------------------------------------------------------------------------------------------------------------------------------------------------------------------------------------------------------------------------------------------------------------------|------------------------|-------------|
|                            | Phase 1   | ATR  | . Niraparib once daily + M4344 100–200 mg daily                                                                                                      | . Ovarian cancer patients with disease progression while on PARPi | . No                                                                                                                                                                                                                                                                            | Not yet recruiting     | NCT04149145 |
|                            | Phase 1   | CHK1 | . Olaparib intermittent schedule, and prexasertib d1 and d15 every 28 days                                                                           | . Advanced solid tumors with prior PARPi treatment                | . No<br>. Expansion cohort will include only HGSC with <i>BRCA1/2</i> mutations                                                                                                                                                                                                 | Active, not recruiting | NCT03057145 |
|                            | Phase 2   | WEE1 | . Adavosertib daily d1 to d5 and d8 to d12 every 21 days<br>. Adavosertib daily d1 to d3 and d8 d10) and olaparib twice daily d1to d21 every 21 days | . Ovarian cancer patients with disease progression while on PARPi | . No                                                                                                                                                                                                                                                                            | Recruiting             | NCT03579316 |
| Immunotherapy combinations | Phase 1-2 | ATR  | . Berzosertib and avelumab                                                                                                                           | . Advanced solid tumors                                           | . DDR deficient: ARID1A, ATM, ATR, ATRX, BAP1, BARD1, BRCA1/2, BRIP1, CDK12, CHEK2, FANCA, FANCC, FANCD2, FANCE, FANCF, FANCM, MRE11A, MSH2, NBN (NBS1), PALB2, RAD51, RAD51C, RAD51D, SMARCB1, and VHL, or other related genes at the discretion of the principal investigator | Recruiting             | NCT04266912 |
|                            | Phase 1   | ATR  | . BAY1895344 and pembrolizumab                                                                                                                       | . Advanced solid tumors                                           | . No                                                                                                                                                                                                                                                                            | Recruiting             | NCT04095273 |

QD, once daily; BD, twice daily; AUC, area under the curve; HGSC, high-grade serous ovarian carcinoma; CCC, clear cell carcinoma; HR genes, homologous recombination genes; PARPi, PARP inhibitor; DDR, DNA damage response.

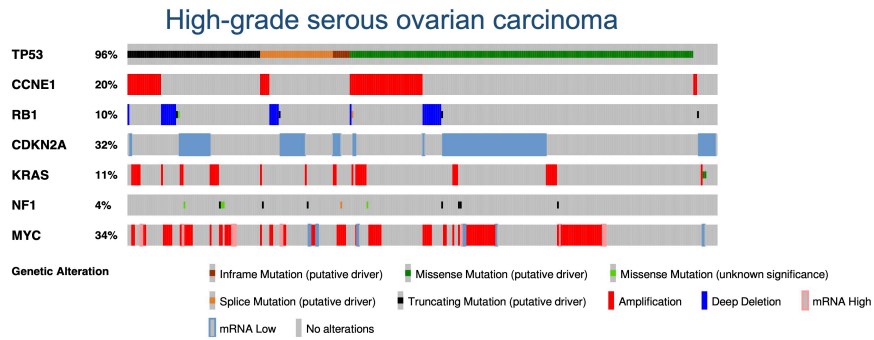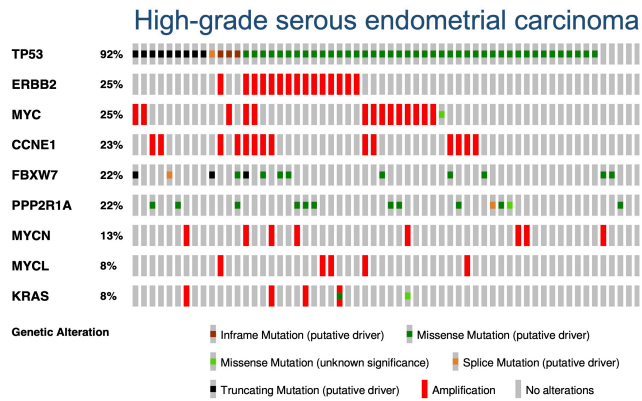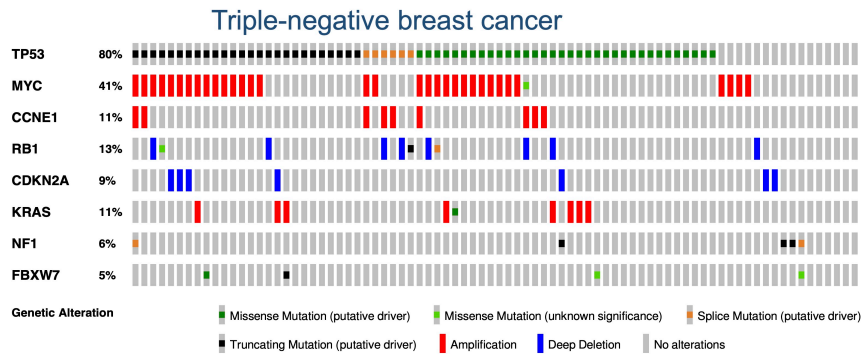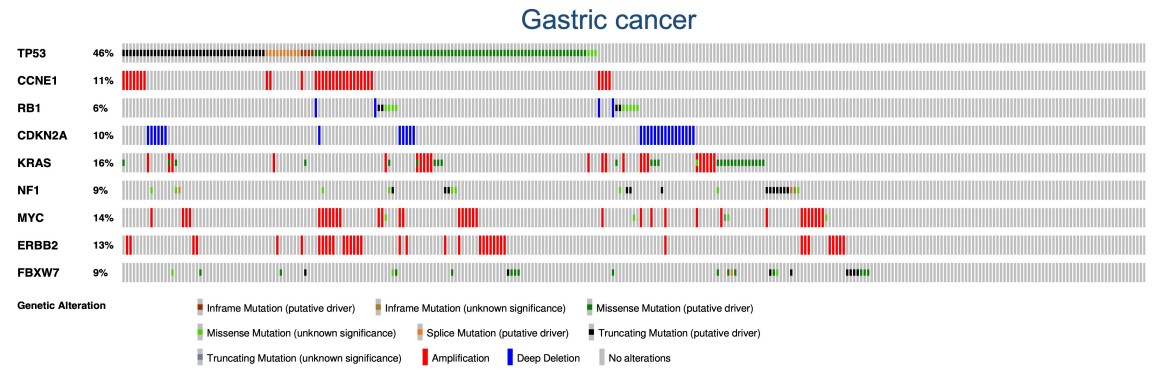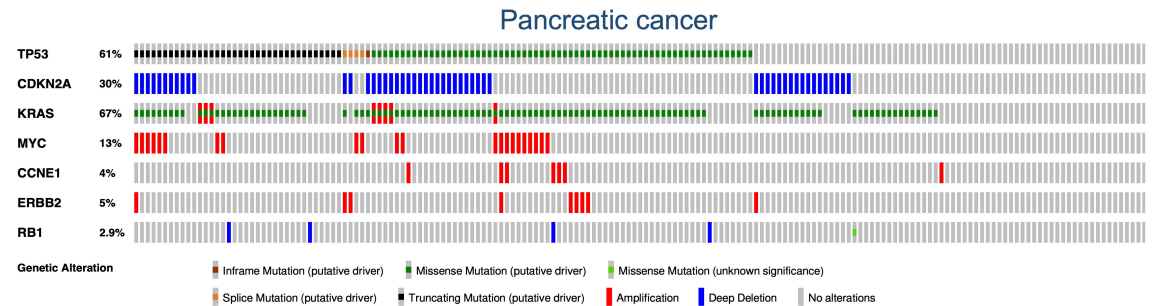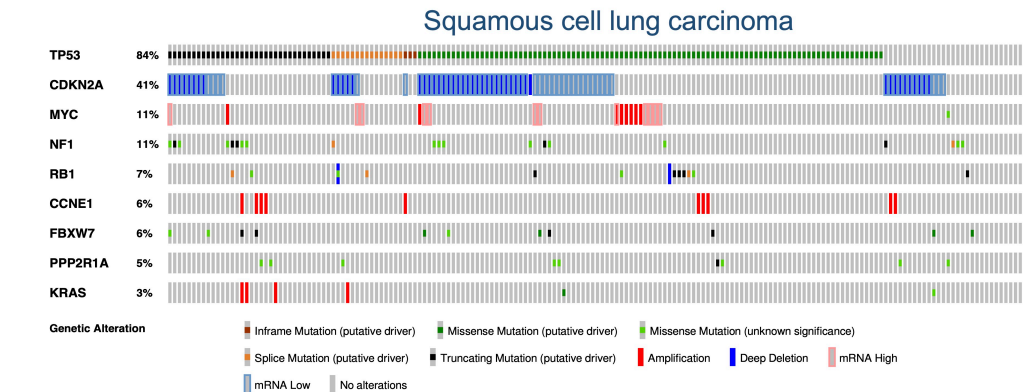

**Supplementary figure 1. Prevalence of various mechanisms of high replication stress in high-grade serous ovarian carcinoma, high-grade serous endometrial carcinoma, triple-negative breast cancer, gastric cancer, pancreatic cancer and squamous cell lung carcinoma from TCGA cohorts.**
